# Supplementary material for: Multicenter electron-sharing σ-bonding in the AgFe(CO)4−complex
Source: Royal Society of Chemistry journal article supplement (doi:10.1039/d0dt02685a), 2020-01-01
Supplement: d0dt02685a1.pdf [file d0dt02685a1.pdf]

## Multicenter electron-sharing $\sigma$ bonding in the $\text{AgFe}(\text{CO})_4^-$ complex

Zhiling Liu,<sup>\*, a</sup> Yan Bai,<sup>a</sup> Ya Li,<sup>a</sup> Jing He,<sup>a</sup> Qingyang Lin,<sup>a</sup> Lina Hou,<sup>a</sup> Hai-Shun Wu,<sup>a</sup>  
Fuqiang Zhang,<sup>a</sup> Jianfeng Jia,<sup>a</sup> Hua Xie<sup>\*, b</sup> and Zichao Tang<sup>\*, c</sup>

---

<sup>a</sup>*School of Chemical and Material Science, Key Laboratory of Magnetic Molecules & Magnetic Information Materials, the Ministry of Education, Shanxi Normal University, No. 1, Gongyuan Street, Linfen, Shanxi 041004, China. E-mail: lzling@sxnu.edu.cn*

<sup>b</sup>*State Key Laboratory of Molecular Reaction Dynamics, Dalian Institute of Chemical Physics, Chinese Academy of Sciences, Dalian 116023, China. E-mail: xiehua@dicp.ac.cn*

<sup>c</sup>*Collaborative Innovation Center of Chemistry for Energy Materials, State Key Laboratory for Physical Chemistry of Solid Surfaces, and Department of Chemistry, College of Chemistry and Chemical Engineering, Xiamen University, Xiamen, Fujian 361005, China. E-mail: zctang@xmu.edu.cn*

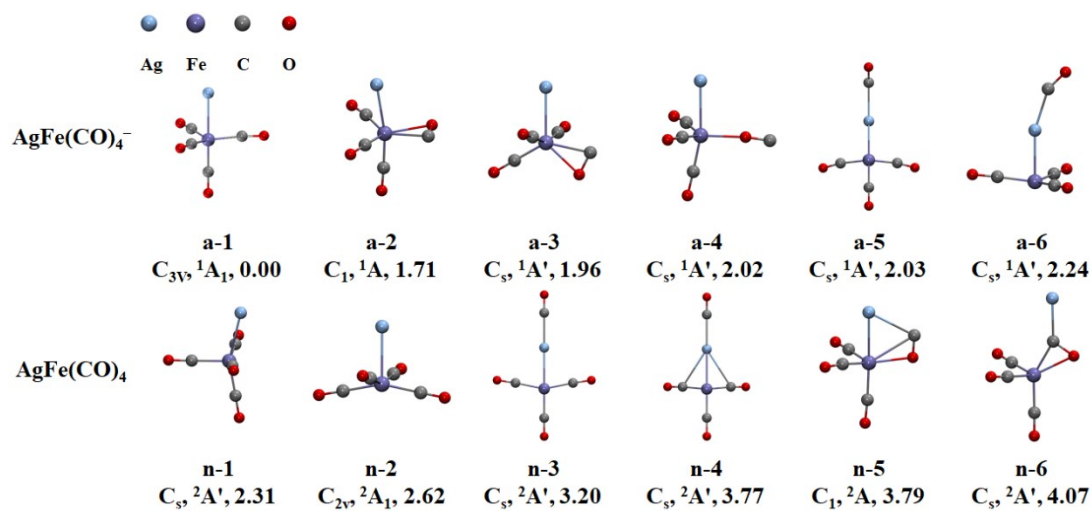

**Fig. S1** Optimized ground-state and low-lying geometries of  $\text{AgFe(CO)}_4^{-1/0}$  complexes at the B3LYP/def2-TZVPP level. The symmetry, electronic states, and the energies (in eV) relative to the ground-state anion are indicated.

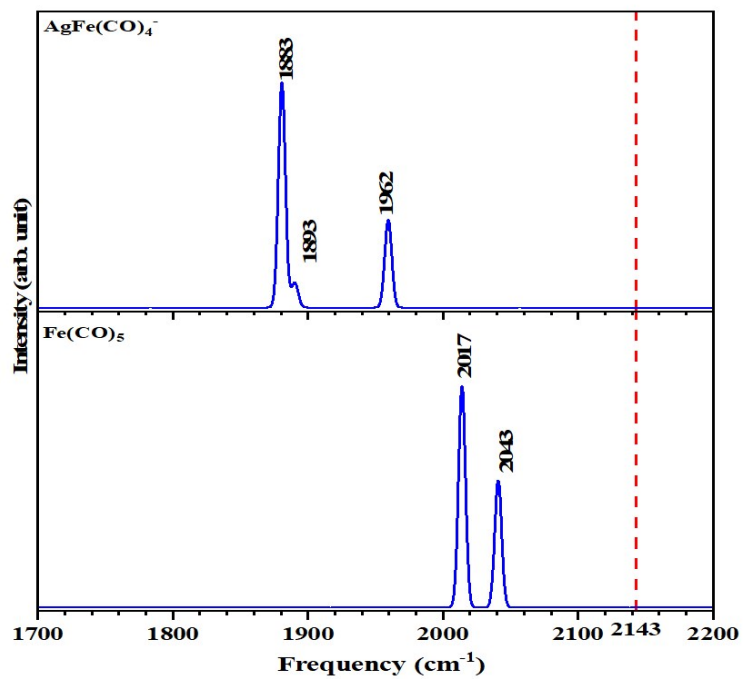

**Fig. S2** Simulated IR spectra of  $\text{AgFe(CO)}_4^-$  and  $\text{Fe(CO)}_5$  complexes.

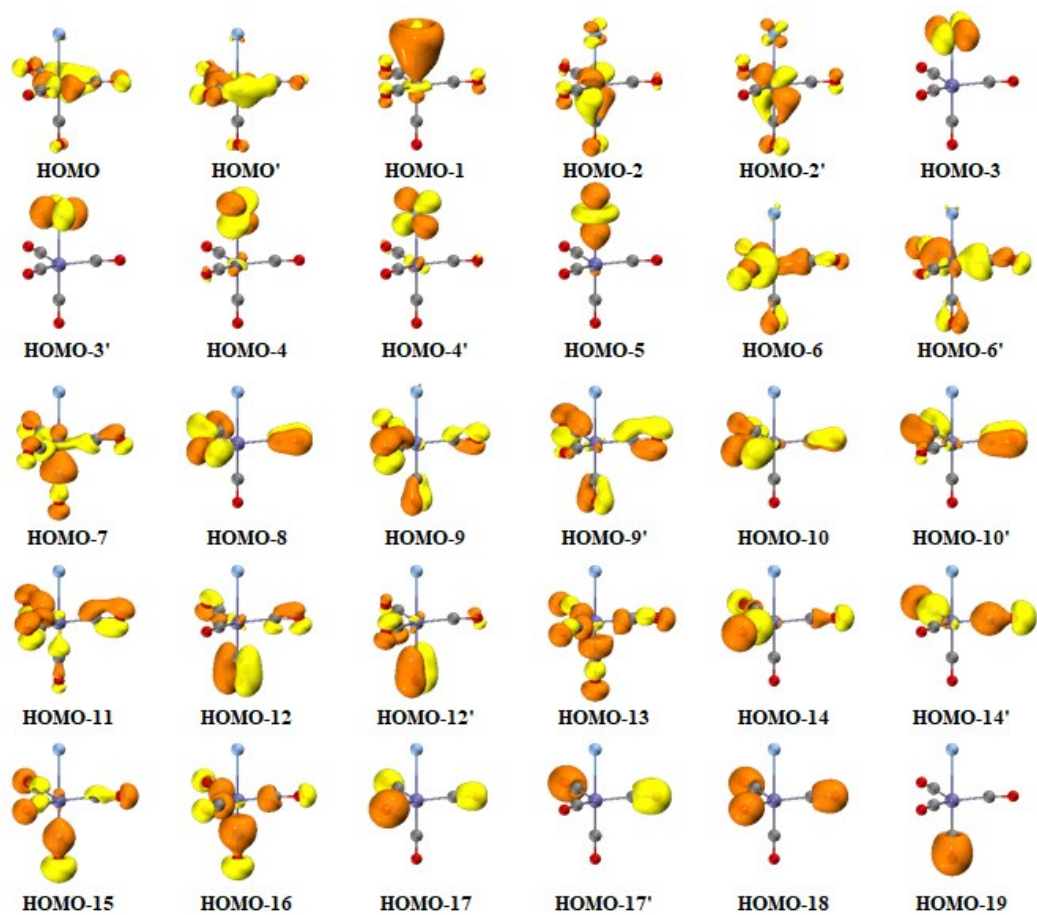

**Fig. S3** Valence canonical molecular orbitals of  $\text{AgFe}(\text{CO})_4^-$  anion at the B3LYP-D3(BJ)/def2-TZVPP level. (isosurface = 0.06 au)

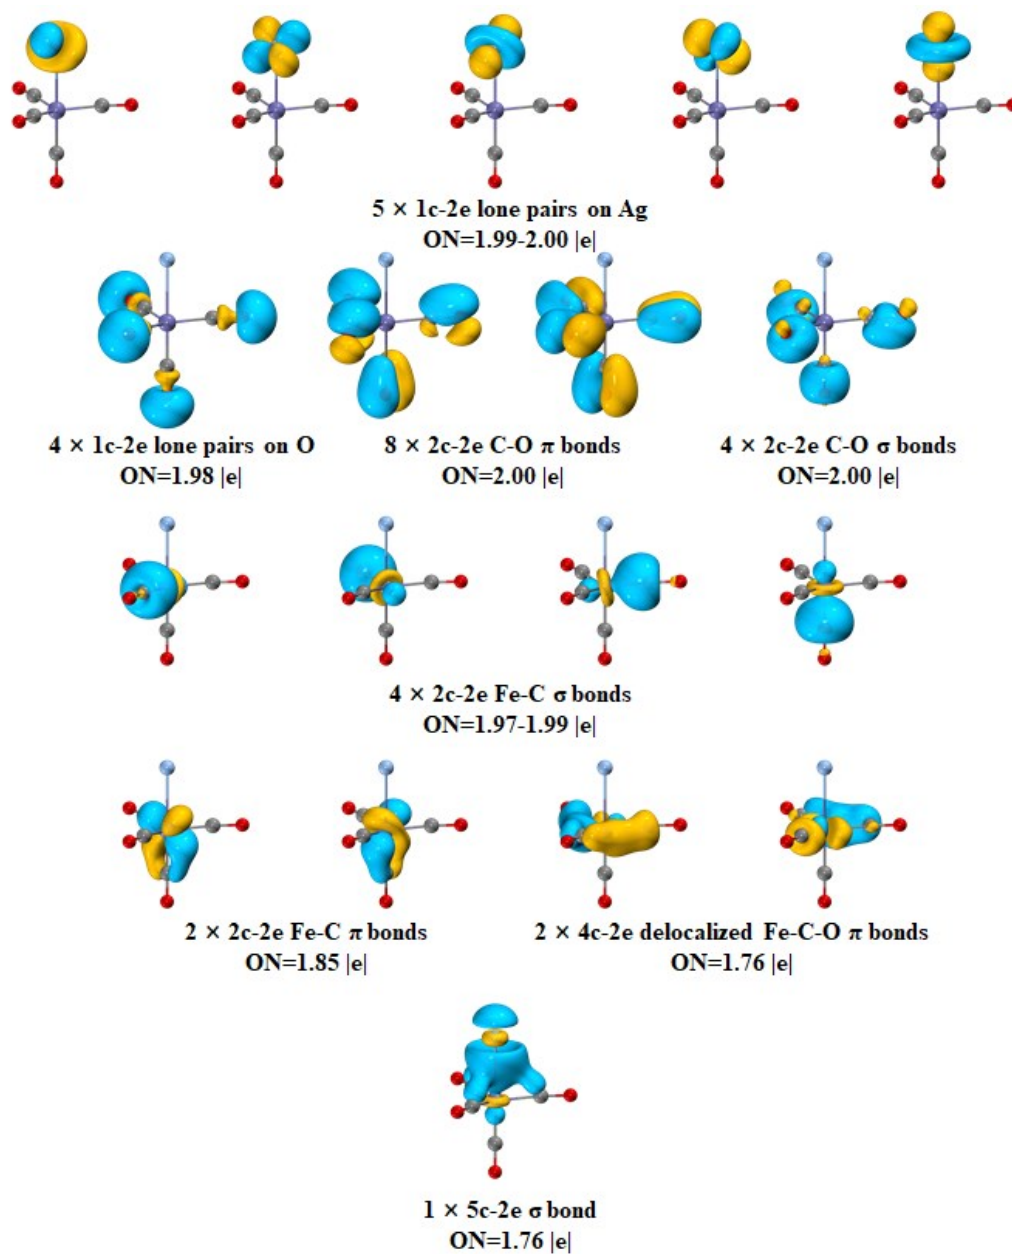

**Fig.S4** The AdNDP analysis for  $\text{AgFe}(\text{CO})_4^-$  anion at the B3LYP-D3(BJ)/def2-TZVPP level. Occupation numbers (ONs) are shown. (isosurface = 0.06 au)

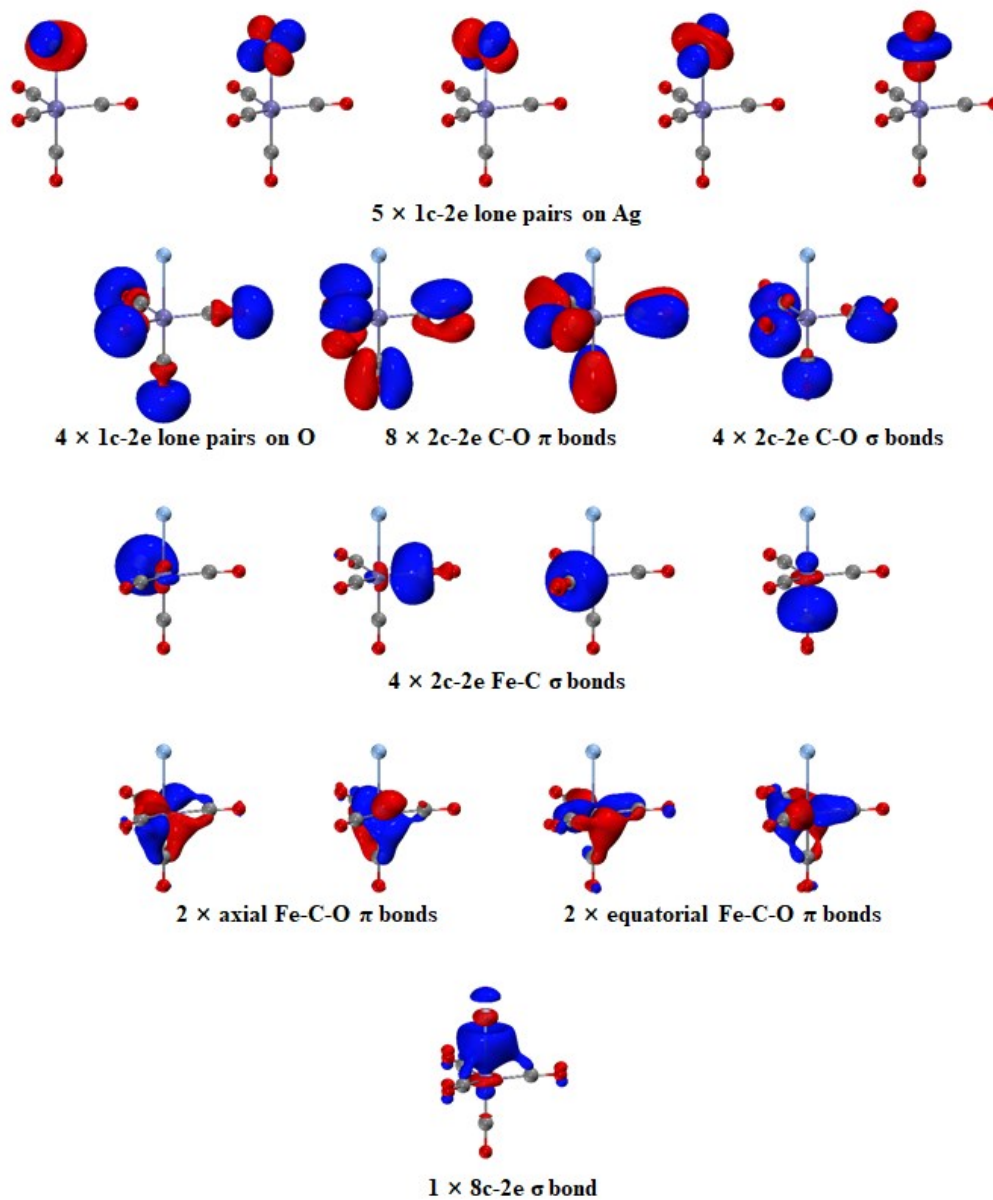

**Fig. S5** The natural localized molecular orbital (NLMO) analysis for  $\text{AgFe}(\text{CO})_4^-$  anion at the B3LYP-D3(BJ)/def2-TZVPP level. (isosurface = 0.06 au)

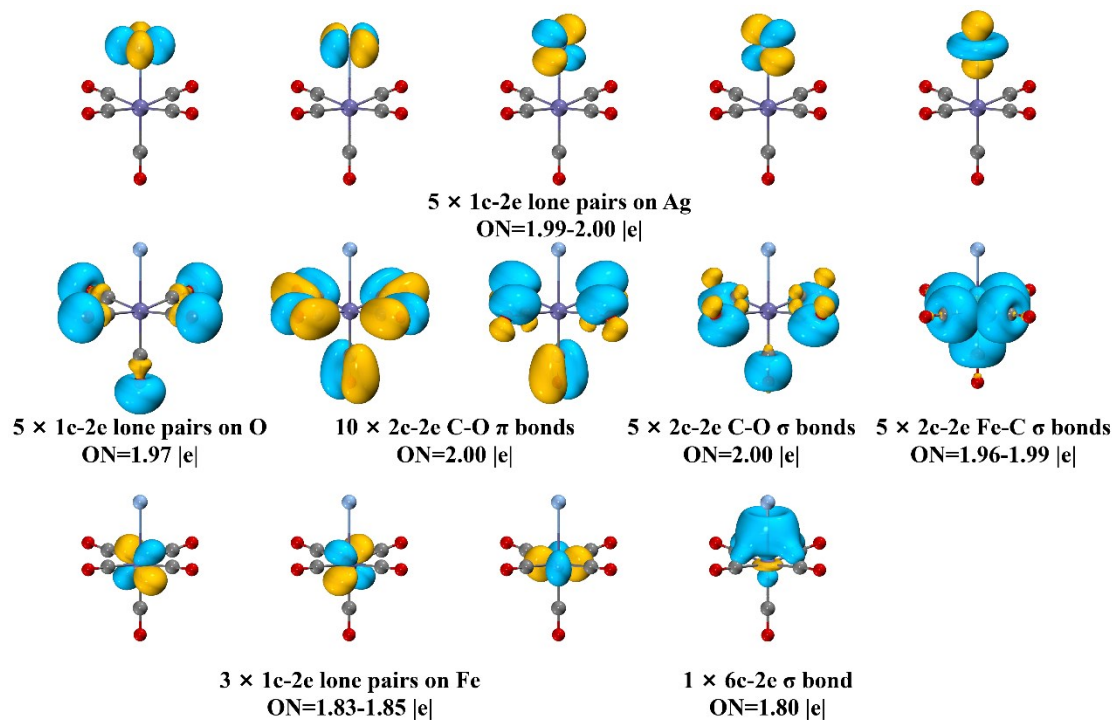

**Fig.S6** The AdNDP analysis for  $\text{AgFe}(\text{CO})_5^+$  cation at the B3LYP-D3(BJ)/def2-TZVPP level. Occupation numbers (ONs) are shown. (isosurface = 0.06 au)

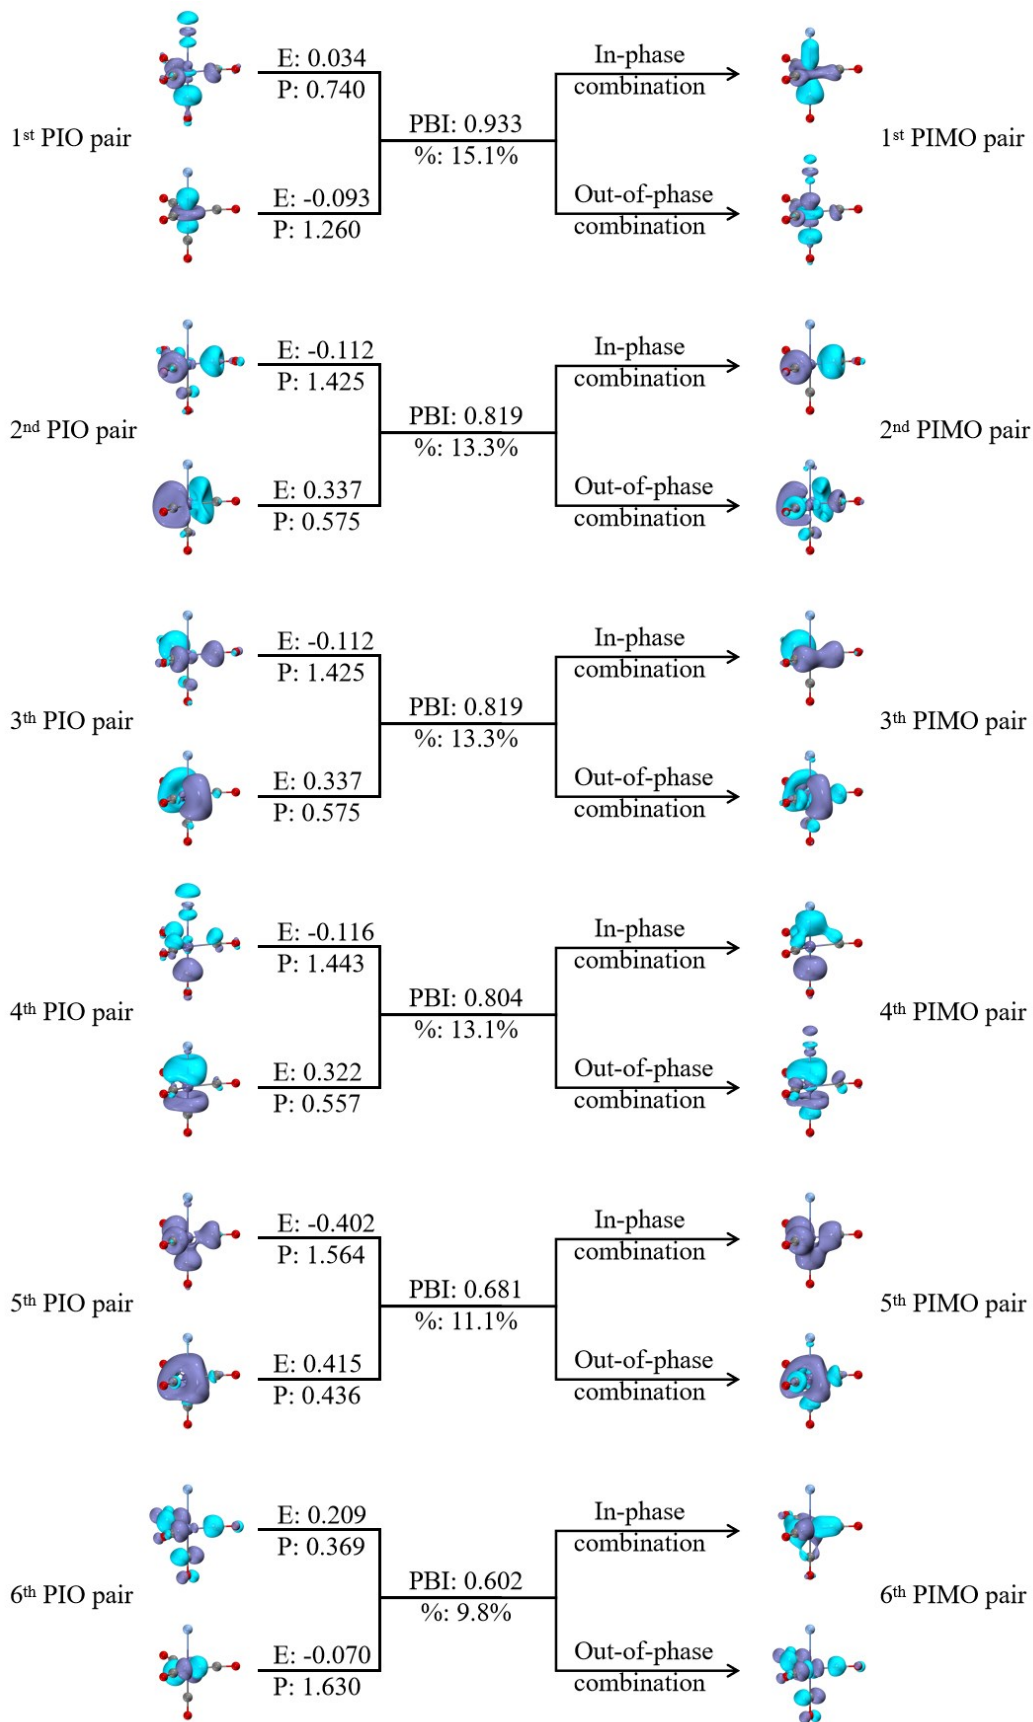



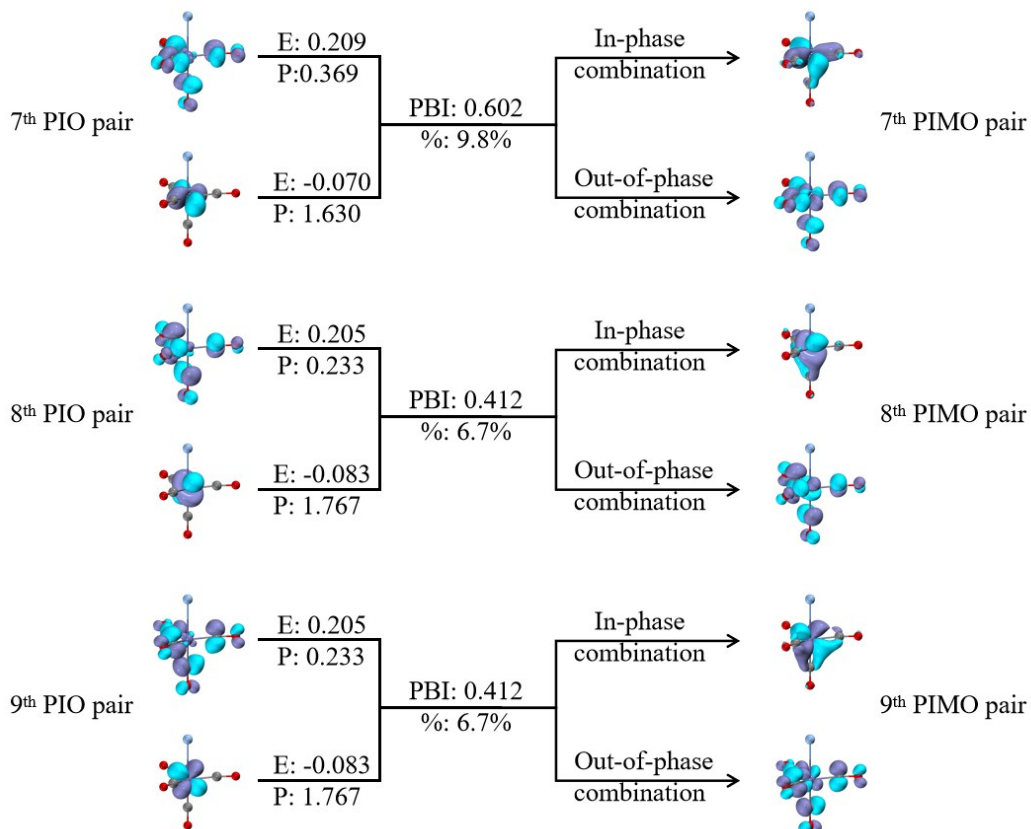

**Fig. S7** Results of analysis on  $\text{AgFe(CO)}_4^-$  anion with the central iron atom as one fragment and the remaining as the other fragment at the B3LYP-D3(BJ)/def2-TZVPP level. (isosurface = 0.06 au)

The cartesian coordinates of  $\text{AgFe}(\text{CO})_4^{-/0}$ ,  $\text{Fe}(\text{CO})_5$  and  $\text{AgFe}(\text{CO})_5^+$  at B3LYP-D3(BJ)/def2-TZVPP level.

(1)  $\text{AgFe}(\text{CO})_4^-$

|    |                 |                 |                 |
|----|-----------------|-----------------|-----------------|
| Ag | 0.000000000000  | 0.000000000000  | 1.804700000000  |
| Fe | 0.000000000000  | 0.000000000000  | -0.731457000000 |
| C  | 0.000000000000  | 0.000000000000  | -2.477211000000 |
| O  | 0.000000000000  | 0.000000000000  | -3.635520000000 |
| C  | 0.000000000000  | 1.776263000000  | -0.538385000000 |
| O  | 0.000000000000  | 2.935904000000  | -0.506860000000 |
| C  | 1.538289000000  | -0.888132000000 | -0.538385000000 |
| O  | 2.542567000000  | -1.467952000000 | -0.506860000000 |
| C  | -1.538289000000 | -0.888132000000 | -0.538385000000 |
| O  | -2.542567000000 | -1.467952000000 | -0.506860000000 |

(2)  $\text{AgFe}(\text{CO})_4$

|    |                 |                 |                 |
|----|-----------------|-----------------|-----------------|
| Ag | -0.825033000000 | -1.637729000000 | 0.000000000000  |
| Fe | 0.456806000000  | 0.554392000000  | 0.000000000000  |
| C  | 0.403002000000  | 0.171929000000  | 1.786906000000  |
| O  | 0.403002000000  | 0.023544000000  | 2.920162000000  |
| C  | -0.861883000000 | 1.839150000000  | 0.000000000000  |
| O  | -1.683968000000 | 2.628036000000  | 0.000000000000  |
| C  | 1.924470000000  | 1.615157000000  | 0.000000000000  |
| O  | 2.838967000000  | 2.296136000000  | 0.000000000000  |
| C  | 0.403002000000  | 0.171929000000  | -1.786906000000 |
| O  | 0.403002000000  | 0.023544000000  | -2.920162000000 |

(3)  $\text{Fe}(\text{CO})_5$

|    |                |                |                |
|----|----------------|----------------|----------------|
| Fe | 0.000000000000 | 0.000000000000 | 0.000000000000 |
|----|----------------|----------------|----------------|

|   |                 |                 |                 |
|---|-----------------|-----------------|-----------------|
| C | 0.000000000000  | 1.815686000000  | 0.000000000000  |
| O | 0.000000000000  | 2.955656000000  | 0.000000000000  |
| C | 1.572430000000  | -0.907843000000 | 0.000000000000  |
| O | 2.559673000000  | -1.477828000000 | 0.000000000000  |
| O | -2.559673000000 | -1.477828000000 | 0.000000000000  |
| C | -1.572430000000 | -0.907843000000 | 0.000000000000  |
| O | 0.000000000000  | 0.000000000000  | 2.958337000000  |
| C | 0.000000000000  | 0.000000000000  | 1.822121000000  |
| C | 0.000000000000  | 0.000000000000  | -1.822121000000 |
| O | 0.000000000000  | 0.000000000000  | -2.958337000000 |

(4)  $\text{AgFe}(\text{CO})_5^+$

|    |                 |                 |                 |
|----|-----------------|-----------------|-----------------|
| Ag | 0.000000000000  | 0.000000000000  | 1.873767000000  |
| Fe | 0.000000000000  | 0.000000000000  | -0.718782000000 |
| C  | 0.000000000000  | 1.842708000000  | -0.493918000000 |
| O  | 0.000000000000  | 2.966353000000  | -0.393264000000 |
| C  | -1.842708000000 | 0.000000000000  | -0.493918000000 |
| O  | -2.966353000000 | 0.000000000000  | -0.393264000000 |
| C  | 1.842708000000  | 0.000000000000  | -0.493918000000 |
| O  | 2.966353000000  | 0.000000000000  | -0.393264000000 |
| C  | 0.000000000000  | 0.000000000000  | -2.566658000000 |
| O  | 0.000000000000  | 0.000000000000  | -3.692532000000 |
| C  | 0.000000000000  | -1.842708000000 | -0.493918000000 |
| O  | 0.000000000000  | -2.966353000000 | -0.393264000000 |
